# Supplementary material for: Immune priming against bacteria in spiders and scorpions?
Source: PeerJ journal article supplement (doi:10.7717/peerj.9285), 2020-06-05
Supplement: RAW.DATA.PEERJ.xlsx [file RAW.DATA.PEERJ.xlsx]

## Sheet: scorpions
treatment	status	time	sex
lps.bacteria	1	1	female
lps.bacteria	1	1	female
lps.bacteria	1	1	female
lps.bacteria	1	1	female
lps.bacteria	1	2	female
lps.bacteria	1	2	female
lps.bacteria	1	2	female
lps.bacteria	1	3	female
lps.bacteria	1	3	female
lps.bacteria	1	3	female
lps.bacteria	0	15	female
lps.bacteria	1	1	male
lps.bacteria	1	2	male
lps.bacteria	1	2	male
lps.bacteria	1	3	male
lps.bacteria	1	3	male
lps.bacteria	0	15	male
lps.bacteria	0	15	male
lps.bacteria	0	15	male
lps.bacteria	0	15	male
lps.bacteria	0	15	male
lps.bacteria	0	15	female
lps.bacteria	0	15	female
lps.bacteria	0	15	female
lps.bacteria	0	15	female
lps.pbs	1	13	male
lps.pbs	0	15	male
lps.pbs	0	15	male
lps.pbs	0	15	male
lps.pbs	0	15	male
lps.pbs	0	15	male
lps.pbs	0	15	male
lps.pbs	0	15	male
lps.pbs	0	15	male
lps.pbs	0	15	male
lps.pbs	0	15	male
lps.pbs	0	15	female
lps.pbs	0	15	female
lps.pbs	0	15	female
lps.pbs	0	15	female
lps.pbs	0	15	female
lps.pbs	0	15	female
lps.pbs	0	15	female
lps.pbs	0	15	female
lps.pbs	0	15	female
lps.pbs	0	15	female
lps.pbs	0	15	female
lps.pbs	0	15	female
naive.bacteria	1	1	female
naive.bacteria	1	2	female
naive.bacteria	1	2	female
naive.bacteria	1	2	female
naive.bacteria	1	2	female
naive.bacteria	1	3	female
naive.bacteria	1	3	female
naive.bacteria	1	3	female
naive.bacteria	1	3	female
naive.bacteria	1	3	female
naive.bacteria	1	1	male
naive.bacteria	1	1	male
naive.bacteria	1	2	male
naive.bacteria	1	2	male
naive.bacteria	1	3	male
naive.bacteria	1	3	male
naive.bacteria	1	3	male
naive.bacteria	1	3	male
naive.bacteria	1	3	male
naive.bacteria	1	3	male
naive.bacteria	1	4	male
naive.bacteria	0	15	female
naive.bacteria	0	15	female
naive.bacteria	0	15	male
naive.pbs	1	2	male
naive.pbs	0	15	male
naive.pbs	0	15	male
naive.pbs	0	15	male
naive.pbs	0	15	male
naive.pbs	0	15	male
naive.pbs	0	15	male
naive.pbs	0	15	male
naive.pbs	0	15	male
naive.pbs	0	15	male
naive.pbs	0	15	male
naive.pbs	0	15	male
naive.pbs	0	15	female
naive.pbs	0	15	female
naive.pbs	0	15	female
naive.pbs	0	15	female
naive.pbs	0	15	female
naive.pbs	0	15	female
naive.pbs	0	15	female
naive.pbs	0	15	female
naive.pbs	0	15	female
naive.pbs	0	15	female
naive.pbs	0	15	female
naive.pbs	0	15	female
naive.pbs	0	15	female
pbs.bacteria	1	1	female
pbs.bacteria	1	1	female
pbs.bacteria	1	2	female
pbs.bacteria	1	3	female
pbs.bacteria	1	3	female
pbs.bacteria	1	3	female
pbs.bacteria	1	4	female
pbs.bacteria	1	4	female
pbs.bacteria	1	1	male
pbs.bacteria	1	2	male
pbs.bacteria	1	2	male
pbs.bacteria	1	3	male
pbs.bacteria	1	3	male
pbs.bacteria	1	3	male
pbs.bacteria	1	5	male
pbs.bacteria	0	15	male
pbs.bacteria	1	12	female
pbs.bacteria	0	15	female
pbs.bacteria	0	15	female
pbs.bacteria	0	15	male
pbs.bacteria	0	15	male
pbs.bacteria	0	15	male
pbs.bacteria	0	15	male
pbs.bacteria	0	15	male
pbs.bacteria	0	15	male
pbs.pbs	1	12	male
pbs.pbs	0	15	male
pbs.pbs	0	15	male
pbs.pbs	0	15	male
pbs.pbs	0	15	male
pbs.pbs	0	15	male
pbs.pbs	0	15	male
pbs.pbs	0	15	male
pbs.pbs	0	15	male
pbs.pbs	0	15	male
pbs.pbs	0	15	male
pbs.pbs	0	15	male
pbs.pbs	0	15	male
pbs.pbs	0	15	male
pbs.pbs	0	15	female
pbs.pbs	0	15	female
pbs.pbs	0	15	female
pbs.pbs	0	15	female
pbs.pbs	0	15	female
pbs.pbs	0	15	female
pbs.pbs	0	15	female
pbs.pbs	0	15	female
pbs.pbs	0	15	female
pbs.pbs	0	15	female
pbs.pbs	0	15	female
lps.bacteria	1	1	male
lps.bacteria	1	1	male
lps.bacteria	1	1	male
lps.bacteria	1	1	male
lps.bacteria	1	1	male
lps.bacteria	1	3	male
lps.bacteria	1	3	male
lps.bacteria	1	3	male
lps.bacteria	1	3	male
lps.bacteria	1	3	male
lps.bacteria	1	3	male
lps.bacteria	1	3	male
lps.bacteria	1	3	male
lps.bacteria	1	3	male
lps.bacteria	1	3	male
lps.bacteria	1	4	male
lps.bacteria	1	4	male
lps.bacteria	1	4	male
lps.bacteria	1	1	female
lps.bacteria	1	1	female
lps.bacteria	1	1	female
lps.bacteria	1	1	female
lps.bacteria	1	3	female
lps.bacteria	1	3	female
lps.bacteria	1	3	female
lps.bacteria	1	3	female
lps.bacteria	1	4	female
lps.bacteria	1	4	female
lps.bacteria	1	5	female
lps.bacteria	0	15	female
lps.bacteria	0	15	female
lps.bacteria	0	15	female
lps.pbs	0	15	male
lps.pbs	0	15	male
lps.pbs	0	15	male
lps.pbs	0	15	male
lps.pbs	0	15	male
lps.pbs	0	15	male
lps.pbs	0	15	male
lps.pbs	0	15	male
lps.pbs	0	15	male
lps.pbs	0	15	male
lps.pbs	0	15	male
lps.pbs	0	15	male
lps.pbs	0	15	male
lps.pbs	0	15	male
lps.pbs	0	15	male
lps.pbs	0	15	male
lps.pbs	0	15	female
lps.pbs	0	15	female
lps.pbs	0	15	female
lps.pbs	0	15	female
lps.pbs	0	15	female
lps.pbs	0	15	female
lps.pbs	0	15	female
lps.pbs	0	15	female
lps.pbs	0	15	female
lps.pbs	0	15	female
lps.pbs	0	15	female
lps.pbs	0	15	female
pbs.bacteria	1	1	male
pbs.bacteria	1	1	male
pbs.bacteria	1	1	male
pbs.bacteria	1	1	male
pbs.bacteria	1	1	male
pbs.bacteria	1	1	male
pbs.bacteria	1	3	male
pbs.bacteria	1	3	male
pbs.bacteria	1	3	male
pbs.bacteria	1	3	male
pbs.bacteria	1	3	male
pbs.bacteria	1	3	male
pbs.bacteria	1	3	male
pbs.bacteria	1	3	male
pbs.bacteria	1	4	male
pbs.bacteria	0	15	male
pbs.bacteria	1	1	female
pbs.bacteria	1	1	female
pbs.bacteria	1	1	female
pbs.bacteria	1	1	female
pbs.bacteria	1	1	female
pbs.bacteria	1	1	female
pbs.bacteria	1	3	female
pbs.bacteria	1	3	female
pbs.bacteria	1	3	female
pbs.bacteria	1	3	female
pbs.bacteria	1	3	female
pbs.bacteria	1	3	female
pbs.bacteria	1	3	female
pbs.bacteria	1	3	female
pbs.pbs	0	15	male
pbs.pbs	0	15	male
pbs.pbs	0	15	male
pbs.pbs	0	15	male
pbs.pbs	0	15	male
pbs.pbs	0	15	male
pbs.pbs	0	15	male
pbs.pbs	0	15	male
pbs.pbs	0	15	male
pbs.pbs	0	15	male
pbs.pbs	0	15	male
pbs.pbs	0	15	male
pbs.pbs	0	15	male
pbs.pbs	0	15	male
pbs.pbs	0	15	male
pbs.pbs	0	15	female
pbs.pbs	0	15	female
pbs.pbs	0	15	female
pbs.pbs	0	15	female
pbs.pbs	0	15	female
pbs.pbs	0	15	female
pbs.pbs	0	15	female
pbs.pbs	0	15	female
pbs.pbs	0	15	female
pbs.pbs	0	15	female
pbs.pbs	0	15	female
pbs.pbs	0	15	female
pbs.pbs	0	15	female
naive.pbs	0	15	male
naive.pbs	0	15	male
naive.pbs	0	15	male
naive.pbs	0	15	male
naive.pbs	0	15	male
naive.pbs	0	15	male
naive.pbs	0	15	male
naive.pbs	0	15	male
naive.pbs	0	15	male
naive.pbs	0	15	male
naive.pbs	0	15	male
naive.pbs	0	15	male
naive.pbs	0	15	male
naive.pbs	0	15	male
naive.pbs	0	15	male
naive.pbs	0	15	male
naive.pbs	0	15	female
naive.pbs	0	15	female
naive.pbs	0	15	female
naive.pbs	0	15	female
naive.pbs	0	15	female
naive.pbs	0	15	female
naive.pbs	0	15	female
naive.pbs	0	15	female
naive.pbs	0	15	female
naive.pbs	0	15	female
naive.pbs	0	15	female
naive.pbs	0	15	female
naive.pbs	0	15	female
naive.bacteria	1	1	male
naive.bacteria	1	1	male
naive.bacteria	1	1	male
naive.bacteria	1	1	male
naive.bacteria	1	1	male
naive.bacteria	1	1	male
naive.bacteria	1	3	male
naive.bacteria	1	3	male
naive.bacteria	1	3	male
naive.bacteria	1	3	male
naive.bacteria	1	3	male
naive.bacteria	1	3	male
naive.bacteria	1	3	male
naive.bacteria	1	2	male
naive.bacteria	1	2	male
naive.bacteria	1	1	female
naive.bacteria	1	1	female
naive.bacteria	1	1	female
naive.bacteria	1	1	female
naive.bacteria	1	1	female
naive.bacteria	1	1	female
naive.bacteria	1	1	female
naive.bacteria	1	3	female
naive.bacteria	1	3	female
naive.bacteria	1	3	female
naive.bacteria	1	3	female
naive.bacteria	1	3	female
naive.bacteria	1	5	female

## Sheet: spiders
treatment	status	time	sex
lps.bacteria	1	1	male
lps.bacteria	1	1	male
lps.bacteria	1	1	male
lps.bacteria	1	4	male
lps.bacteria	1	5	male
lps.bacteria	1	13	male
lps.bacteria	0	15	male
lps.bacteria	1	1	female
lps.bacteria	1	1	female
lps.bacteria	1	1	female
lps.bacteria	1	3	female
lps.bacteria	1	6	female
lps.bacteria	1	12	female
lps.bacteria	1	12	female
lps.bacteria	0	15	female
lps.bacteria	0	15	female
lps.bacteria	0	15	female
lps.bacteria	0	15	female
lps.bacteria	0	15	female
lps.bacteria	0	15	female
lps.pbs	1	1	male
lps.pbs	1	4	male
lps.pbs	1	8	male
lps.pbs	1	12	male
lps.pbs	1	13	male
lps.pbs	1	1	female
lps.pbs	1	2	female
lps.pbs	1	6	female
lps.pbs	1	8	female
lps.pbs	0	15	female
lps.pbs	0	15	female
lps.pbs	0	15	female
lps.pbs	0	15	female
lps.pbs	0	15	female
lps.pbs	0	15	female
lps.pbs	0	15	female
lps.pbs	0	15	female
lps.pbs	0	15	female
lps.pbs	0	15	female
lps.pbs	0	15	female
naive.bacteria	1	1	male
naive.bacteria	1	8	male
naive.bacteria	1	12	male
naive.bacteria	1	12	male
naive.bacteria	1	12	male
naive.bacteria	1	13	male
naive.bacteria	0	15	male
naive.bacteria	0	15	male
naive.bacteria	0	15	male
naive.bacteria	0	15	male
naive.bacteria	0	15	male
naive.bacteria	0	15	male
naive.bacteria	0	15	male
naive.bacteria	1	1	female
naive.bacteria	1	5	female
naive.bacteria	1	8	female
naive.bacteria	1	12	female
naive.bacteria	1	12	female
naive.bacteria	1	13	female
naive.bacteria	1	15	female
naive.pbs	1	2	male
naive.pbs	1	3	male
naive.pbs	1	6	male
naive.pbs	1	14	male
naive.pbs	0	15	male
naive.pbs	0	15	male
naive.pbs	0	15	male
naive.pbs	1	4	female
naive.pbs	1	12	female
naive.pbs	1	12	female
naive.pbs	1	14	female
naive.pbs	0	15	female
naive.pbs	0	15	female
naive.pbs	0	15	female
naive.pbs	0	15	female
naive.pbs	0	15	female
naive.pbs	0	15	female
naive.pbs	0	15	female
naive.pbs	0	15	female
naive.pbs	0	15	female
naive.pbs	0	15	female
naive.pbs	0	15	female
naive.pbs	0	15	female
naive.pbs	0	15	female
naive.pbs	0	15	female
naive.pbs	0	15	female
naive.pbs	0	15	female
pbs.bacteria	1	5	male
pbs.bacteria	1	8	male
pbs.bacteria	1	12	male
pbs.bacteria	1	15	male
pbs.bacteria	0	15	male
pbs.bacteria	0	15	male
pbs.bacteria	0	15	male
pbs.bacteria	0	15	male
pbs.bacteria	0	15	male
pbs.bacteria	0	15	male
pbs.bacteria	1	1	female
pbs.bacteria	1	1	female
pbs.bacteria	1	3	female
pbs.bacteria	1	4	female
pbs.bacteria	1	5	female
pbs.bacteria	1	6	female
pbs.bacteria	0	15	female
pbs.bacteria	0	15	female
pbs.bacteria	0	15	female
pbs.bacteria	0	15	female
pbs.bacteria	0	15	female
pbs.bacteria	0	15	female
pbs.bacteria	0	15	female
pbs.bacteria	0	15	female
pbs.bacteria	0	15	female
pbs.bacteria	0	15	female
pbs.pbs	1	8	male
pbs.pbs	1	12	male
pbs.pbs	1	15	male
pbs.pbs	1	15	male
pbs.pbs	1	15	male
pbs.pbs	0	15	male
pbs.pbs	0	15	male
pbs.pbs	0	15	male
pbs.pbs	0	15	male
pbs.pbs	0	15	male
pbs.pbs	1	4	female
pbs.pbs	1	8	female
pbs.pbs	1	13	female
pbs.pbs	0	15	female
pbs.pbs	0	15	female
pbs.pbs	0	15	female
pbs.pbs	0	15	female
pbs.pbs	0	15	female
pbs.pbs	0	15	female
pbs.pbs	0	15	female
pbs.pbs	0	15	female
pbs.pbs	0	15	female
pbs.pbs	0	15	female
pbs.bacteria	1	2	female
pbs.bacteria	1	2	female
pbs.bacteria	1	2	female
pbs.bacteria	1	3	female
pbs.bacteria	1	3	female
pbs.bacteria	1	3	female
pbs.bacteria	1	4	female
pbs.bacteria	1	4	female
pbs.bacteria	1	4	female
pbs.bacteria	1	4	female
pbs.bacteria	1	4	female
pbs.bacteria	1	4	female
pbs.bacteria	1	5	female
pbs.bacteria	1	5	female
pbs.bacteria	1	5	female
pbs.bacteria	1	5	female
pbs.bacteria	1	5	female
pbs.bacteria	1	7	female
pbs.bacteria	1	8	female
pbs.bacteria	1	9	female
pbs.bacteria	1	9	female
pbs.bacteria	1	10	female
pbs.bacteria	1	10	female
pbs.bacteria	0	15	female
pbs.bacteria	0	15	female
pbs.bacteria	0	15	female
pbs.pbs	1	1	female
pbs.pbs	1	1	female
pbs.pbs	1	3	female
pbs.pbs	1	7	female
pbs.pbs	1	10	female
pbs.pbs	1	15	female
pbs.pbs	0	15	female
pbs.pbs	0	15	female
pbs.pbs	0	15	female
pbs.pbs	0	15	female
pbs.pbs	0	15	female
pbs.pbs	0	15	female
pbs.pbs	0	15	female
pbs.pbs	0	15	female
pbs.pbs	0	15	female
pbs.pbs	0	15	female
pbs.pbs	0	15	female
pbs.pbs	0	15	female
pbs.pbs	0	15	female
pbs.pbs	0	15	female
pbs.pbs	0	15	female
pbs.pbs	0	15	female
pbs.pbs	0	15	female
pbs.pbs	0	15	female
pbs.pbs	0	15	female
pbs.pbs	0	15	female
pbs.pbs	0	15	female
lps.bacteria	1	1	female
lps.bacteria	1	1	female
lps.bacteria	1	3	female
lps.bacteria	1	3	female
lps.bacteria	1	3	female
lps.bacteria	1	3	female
lps.bacteria	1	3	female
lps.bacteria	1	4	female
lps.bacteria	1	4	female
lps.bacteria	1	4	female
lps.bacteria	1	4	female
lps.bacteria	1	5	female
lps.bacteria	1	5	female
lps.bacteria	1	5	female
lps.bacteria	1	9	female
lps.bacteria	1	9	female
lps.bacteria	1	10	female
lps.bacteria	1	15	female
lps.bacteria	0	15	female
lps.bacteria	0	15	female
lps.bacteria	0	15	female
lps.bacteria	0	15	female
lps.bacteria	0	15	female
lps.bacteria	0	15	female
lps.bacteria	0	15	female
lps.bacteria	0	15	female
lps.bacteria	0	15	female
lps.pbs	1	1	female
lps.pbs	1	2	female
lps.pbs	1	3	female
lps.pbs	1	3	female
lps.pbs	0	15	female
lps.pbs	0	15	female
lps.pbs	0	15	female
lps.pbs	0	15	female
lps.pbs	0	15	female
lps.pbs	0	15	female
lps.pbs	0	15	female
lps.pbs	0	15	female
lps.pbs	0	15	female
lps.pbs	0	15	female
lps.pbs	0	15	female
lps.pbs	0	15	female
lps.pbs	0	15	female
lps.pbs	0	15	female
lps.pbs	0	15	female
lps.pbs	0	15	female
lps.pbs	0	15	female
lps.pbs	0	15	female
lps.pbs	0	15	female
lps.pbs	0	15	female
lps.pbs	0	15	female
lps.pbs	0	15	female
lps.pbs	0	15	female
naive.bacteria	1	1	female
naive.bacteria	1	2	female
naive.bacteria	1	2	female
naive.bacteria	1	3	female
naive.bacteria	1	3	female
naive.bacteria	1	3	female
naive.bacteria	1	4	female
naive.bacteria	1	4	female
naive.bacteria	1	4	female
naive.bacteria	1	4	female
naive.bacteria	1	4	female
naive.bacteria	1	4	female
naive.bacteria	1	5	female
naive.bacteria	1	5	female
naive.bacteria	1	5	female
naive.bacteria	1	5	female
naive.bacteria	1	5	female
naive.bacteria	1	9	female
naive.bacteria	1	10	female
naive.bacteria	1	15	female
naive.bacteria	0	15	female
naive.bacteria	0	15	female
naive.bacteria	0	15	female
naive.bacteria	0	15	female
naive.bacteria	0	15	female
naive.bacteria	0	15	female
naive.bacteria	0	15	female
naive.bacteria	0	15	female
naive.pbs	1	4	female
naive.pbs	1	4	female
naive.pbs	1	4	female
naive.pbs	1	4	female
naive.pbs	0	15	female
naive.pbs	0	15	female
naive.pbs	0	15	female
naive.pbs	0	15	female
naive.pbs	0	15	female
naive.pbs	0	15	female
naive.pbs	0	15	female
naive.pbs	0	15	female
naive.pbs	0	15	female
naive.pbs	0	15	female
naive.pbs	0	15	female
naive.pbs	0	15	female
naive.pbs	0	15	female
naive.pbs	0	15	female
naive.pbs	0	15	female
naive.pbs	0	15	female
naive.pbs	0	15	female
naive.pbs	0	15	female
naive.pbs	0	15	female
naive.pbs	0	15	female
naive.pbs	0	15	female
naive.pbs	0	15	female
naive.pbs	0	15	female
naive.pbs	0	15	female

## Sheet: antibacterial.activity
absorbance	treatment
0.76	E.coli
0.76	E.coli
0.76	E.coli
0.726	LPS
0.814	LPS
0.777	LPS
0.579	LPS
0.068	LPS
0.703	LPS
0.688	LPS
0.762	LPS
0.362	LPS
0.656	PBS
0.757	PBS
0.621	PBS
0.595	PBS
0.773	PBS
0.67	PBS
0.692	Naive
0.576	Naive
0.706	Naive
0.743	Naive
0.727	Naive
0.72	Naive
0.688	Naive
0.713	Naive
0.747	Naive

## Sheet: readme
Supporting data for the manuscript Immune priming against bacteria in spiders and scorpions?
by Dumas Gálvez, Yostin Añino, Carlos Vega & Eleodoro Bonilla
Survival Experiments
treatment: first code represents initial priming treatment and secod code indicates the either the final bacterial challenge (bacteria) or injection with control solution (PBS)
status
1=dead
0=alive
time: time of event
Antibacterial activity
measuread as optical density at 630 nm
