# Supplementary material for: Immune priming against bacteria in spiders and scorpions?
Source: PeerJ journal article supplement (doi:10.7717/peerj.9285), 2020-06-05
Supplement: VIRULENCE.TEST.SCORPIONS.SPIDERS.xlsx [file VIRULENCE.TEST.SCORPIONS.SPIDERS.xlsx]

## Sheet: scorpions
treatment	status	time
LB	0	10
LB	0	10
LB	0	10
LB	0	10
LB	0	10
LB	0	10
LB	0	10
LB	0	10
LB	0	10
LB	0	10
LB	0	10
LB	0	10
LB	0	10
LB	0	10
LB	0	10
LB+HD1	1	1
LB+HD1	1	1
LB+HD1	1	4
LB+HD1	1	4
LB+HD1	1	4
LB+HD1	1	5
LB+HD1	1	10
LB+HD1	0	10
LB+HD1	0	10
LB+HD1	0	10
LB+HD1	0	10
LB+HD1	0	10
LB+HD1	0	10
LB+HD1	0	10
LB+HD1	0	10
LB+HD2	1	1
LB+HD2	1	4
LB+HD2	1	4
LB+HD2	1	6
LB+HD2	1	9
LB+HD2	0	10
LB+HD2	0	10
LB+HD2	0	10
LB+HD2	0	10
LB+HD2	0	10
LB+HD2	0	10
LB+HD2	0	10
LB+HD2	0	10
LB+HD2	0	10
LB+HD2	0	10

## Sheet: spiders
treatment	status	time
LB	1	4
LB	1	8
LB	0	10
LB	0	10
LB	0	10
LB	0	10
LB	0	10
LB	0	10
LB	0	10
LB	0	10
LB	0	10
LB	0	10
LB+HD1	1	1
LB+HD1	1	1
LB+HD1	1	3
LB+HD1	1	10
LB+HD1	1	10
LB+HD1	1	10
LB+HD1	0	10
LB+HD1	0	10
LB+HD1	0	10
LB+HD1	0	10
LB+HD1	0	10
LB+HD2	1	1
LB+HD2	1	3
LB+HD2	1	6
LB+HD2	1	7
LB+HD2	1	8
LB+HD2	1	9
LB+HD2	1	10
LB+HD2	1	10
LB+HD2	1	10
LB+HD2	0	10
LB+HD2	0	10
LB+HD2	0	10

## Sheet: Sheet2
Supplementary material for the manuscript Immune priming against bacteria in spiders and scorpions? by Dumas Gálvez, Yostin Añino, Carlos Vega & Eleodoro Bonilla
Virulence test of strain of Escherichia coli used in the experiments
LB: Control individuals injected with liquid medium LB
LB+HD1: individuals injected with a high dose of Escherichia coli (1x107 cells/ml) in LB
LB+HD2: individuals injected with a high dose of Escherichia coli (1x106 cells/ml) in LB
Injections
Scorpions were injected with 100 microliters of the bacterial solution
Spiders were injected with 138 nanoliters of the bacterial solution
